# Supplementary material
Source: PubMed Central journal article supplement (PMC2978254)
Supplement: NIHMS235232-supplement-Supp_Table_S1___Figure_S1-S6.pdf [file NIHMS235232-supplement-Supp_Table_S1___Figure_S1-S6.pdf]

**Table S1.** Strains, plasmids and primers used in this study

| Strain, plasmid or primer sequence | Relevant characteristics*                                                                                                                                                                                                             | Source or reference         |
|------------------------------------|---------------------------------------------------------------------------------------------------------------------------------------------------------------------------------------------------------------------------------------|-----------------------------|
| <u>Bacterial strains</u>           |                                                                                                                                                                                                                                       |                             |
| <i>Escherichia coli</i>            |                                                                                                                                                                                                                                       |                             |
| DH5 $\alpha$                       | F- $\phi$ 80 <i>lacZ</i> $\Delta$ M15 $\Delta$ ( <i>lacZYA-argF</i> ) U169 <i>recA1 endA1 hsdR17</i> ( <i>r<sub>k</sub><sup>-</sup></i> , <i>m<sub>k</sub><sup>+</sup></i> ) <i>phoA supE44</i> $\lambda$ - <i>thi-1 gyrA96 relA1</i> | (Hanahan, 1983)             |
| DH5-T1 <sup>R</sup>                | F- $\phi$ 80 <i>lacZ</i> $\Delta$ M15 $\Delta$ ( <i>lacZYA-argF</i> )U169 <i>recA1 endA1 hsdR17</i> ( <i>rk<sup>-</sup></i> , <i>mk<sup>+</sup></i> ) <i>phoA supE44 thi-1 gyrA96 relA1 tonA</i> (confers resistance to phage T1)     | Invitrogen Inc.             |
| DH5 $\lambda$ pir                  | DH5 $\alpha$ lysogenized with lambda pir                                                                                                                                                                                              | (Dunn <i>et al.</i> , 2010) |
| <i>Vibrio fischeri</i>             |                                                                                                                                                                                                                                       |                             |
| AKD711                             | ES114 $\Delta$ <i>nsrR</i>                                                                                                                                                                                                            | (Dunn <i>et al.</i> , 2010) |
| ES114                              | Wild-type isolate from <i>E. scolopes</i> light organ                                                                                                                                                                                 | (Boettcher & Ruby, 1990)    |
| YLW9                               | ES114 carrying pVSV102, Kan <sup>R</sup>                                                                                                                                                                                              | this study                  |
| YLW8                               | ES114 carrying pVSV208, Cam <sup>R</sup>                                                                                                                                                                                              | this study                  |
| YLW62                              | ES114 $\Delta$ <i>norV</i> carrying pVSV208, Cam <sup>R</sup>                                                                                                                                                                         | this study                  |
| YLW61                              | ES114 $\Delta$ <i>norV</i> carrying pVSV102, Kan <sup>R</sup>                                                                                                                                                                         | this study                  |
| YLW60                              | ES114 $\Delta$ <i>hmp</i> carrying pYLW29, Cam <sup>R</sup>                                                                                                                                                                           | this study                  |
| YLW59                              | ES114 $\Delta$ <i>hmp</i> carrying pVSV105, Cam <sup>R</sup>                                                                                                                                                                          | this study                  |
| YLW57                              | ES114 $\Delta$ <i>hmp</i> carrying pVSV208, Cam <sup>R</sup>                                                                                                                                                                          | this study                  |
| YLW56                              | ES114 $\Delta$ <i>hmp</i> carrying pVSV102, Kan <sup>R</sup>                                                                                                                                                                          | this study                  |
| YLW55                              | ES114 $\Delta$ <i>nsrR</i> carrying pLYW45                                                                                                                                                                                            | this study                  |

|        |                                                                                                |            |
|--------|------------------------------------------------------------------------------------------------|------------|
| YLW52  | ES114 $\Delta$ <i>nsrR</i> carrying pVSV208, Cm <sup>R</sup>                                   | this study |
| YLW51  | ES114 $\Delta$ <i>nsrR</i> carrying pVSV102, Kan <sup>R</sup>                                  | this study |
| YLW50  | ES114 $\Delta$ <i>nsrR</i> carrying pVSV209, Kan <sup>R</sup> and promoterless Cm <sup>R</sup> | this study |
| YLW48  | ES114 carrying pYLW45, Kan <sup>R</sup> and promoterless Cm <sup>R</sup>                       | this study |
| YLW42  | ES114 carrying pYLW29, Cam <sup>R</sup>                                                        | this study |
| YLW40  | ES114 carrying pVSV209, Kan <sup>R</sup> and promoterless Cm <sup>R</sup>                      | this study |
| YLW38  | ES114 $\Delta$ <i>norV</i>                                                                     | this study |
| YLW25  | ES114 carrying pVSV105, Cam <sup>R</sup>                                                       | this study |
| YLW20  | ES114 $\Delta$ <i>hmp</i>                                                                      | this study |
| YLW117 | ES114 $\Delta$ <i>hmp-norV</i> carrying pVSV102, Kan <sup>R</sup>                              | this study |
| YLW116 | ES114 $\Delta$ <i>hmp-norV</i> carrying pVSV208, Cm <sup>R</sup>                               | this study |
| YLW113 | ES114 $\Delta$ <i>hmp-norV</i>                                                                 | this study |

### Plasmids

|                     |                                                                                                                                                                                                                                         |                             |
|---------------------|-----------------------------------------------------------------------------------------------------------------------------------------------------------------------------------------------------------------------------------------|-----------------------------|
| pAKD711             | $\Delta$ <i>nsrR</i> allele, R6K $\gamma$ and ColE1 replication origins, RP4 <i>oriT</i> , <i>ermR</i> , <i>kanR</i>                                                                                                                    | (Dunn <i>et al.</i> , 2010) |
| pCR-BluntII<br>TOPO | TOPO PCR-cloning vector, Kan <sup>R</sup>                                                                                                                                                                                               | Invitrogen<br>Inc.          |
| pEVS104             | <i>oriV</i> <sub>R6K<math>\gamma</math></sub> , <i>oriT</i> <sub>RP4</sub> , RP4-derived conjugative helper plasmid, Kan <sup>R</sup>                                                                                                   | (Stabb, 2002)               |
| pVSV102             | <i>oriV</i> <sub>R6K<math>\gamma</math></sub> , <i>oriT</i> <sub>RP4</sub> , <i>oriV</i> <sub>pES213</sub> , <i>Dsgfp</i> -tagged, Kan <sup>R</sup> ,                                                                                   | (Dunn <i>et al.</i> , 2006) |
| pVSV105             | <i>oriV</i> <sub>R6K<math>\gamma</math></sub> , <i>oriT</i> <sub>RP4</sub> , <i>oriV</i> <sub>pES213</sub> , complementation vector, Cam <sup>R</sup>                                                                                   | (Dunn <i>et al.</i> , 2006) |
| pVSV208             | <i>oriV</i> <sub>R6K<math>\gamma</math></sub> , <i>oriT</i> <sub>RP4</sub> , <i>oriV</i> <sub>pES213</sub> , <i>rfp</i> -tagged, Cam <sup>R</sup> ,                                                                                     | (Dunn <i>et al.</i> , 2006) |
| pVSV209             | <i>oriV</i> <sub>R6K<math>\gamma</math></sub> , <i>oriT</i> <sub>RP4</sub> , <i>oriV</i> <sub>pES213</sub> , KanR-constitutively expressed <i>rfp</i> , transcriptional terminators-(AvrII, Sall, StuI)-promoterless CmR and <i>gfp</i> | (Dunn <i>et al.</i> , 2006) |
| pYLW20              | $\Delta$ <i>hmp</i> allele, R6K $\gamma$ and ColE1 replication origins, RP4 <i>oriT</i> , <i>ermR</i> , <i>kanR</i>                                                                                                                     | this study                  |

|        |                                                                                                                            |            |
|--------|----------------------------------------------------------------------------------------------------------------------------|------------|
| pYLW27 | <i>ΔnorV</i> allele, R6Kγ and ColE1 replication origins, RP4 <i>oriT</i> , <i>ermR</i> , <i>kanR</i>                       | this study |
| pYLW29 | pComhmp, <i>hmp</i> + complementing fragment cloned into pVSV105                                                           | this study |
| pYLW45 | pPhmp:: <i>gfp</i> , a 300bp <i>hmp</i> promoter region cloned into pVSV209 to drive expression of promoterless <i>gfp</i> | this study |

### Primers<sup>†</sup>

|               |                                                                 |            |
|---------------|-----------------------------------------------------------------|------------|
| hmpcomp-for   | 5'-AGT CGT <u>ACT CTA GAC</u> TCG AAT GAC ATC ACC AA-3'         | this study |
| hmpcomp-rev   | 5'-GCT AGA <u>TCG AGC TCT</u> GAG TTT CAT CAA CTC GAA-3'        | this study |
| hmppro-for    | 5'-TGA CGC <u>TAC CTA GGC</u> GAA AGA GGT GCT TTC AT-3'         | this study |
| hmppro-rev    | 5'-CAT GGT <u>ACA GGC CTC</u> CCA AAT TTA TCT TCA ACT AAC TC-3' | this study |
| VF0074qrt-for | 5'- CGG TAT GAG TGC GTT TGG TCT TGC -3'                         | this study |
| VF0074qrt-rev | 5'- CTG CAT CAC TCC TGG GTA ACG CTC -3'                         | this study |
| hmpqrt-for    | 5'- TGA AGT GCT ATT ACC AGC GGT TG -3'                          | this study |
| hmpqrt-rev    | 5'- AAG AGT GGC AAG TAA GTG ACC AC -3'                          | this study |
| norVqrt-for   | 5'- TCT TAC GCC ATT CAG TGC TTT GG -3'                          | this study |
| norVqrt-rev   | 5'- CTC GCC ATA CAC AAC CGT GAG -3'                             | this study |

---

\*Abbreviations used: Cam<sup>R</sup>, chloramphenicol resistance; Erm<sup>R</sup>, erythromycin resistance; Kan<sup>R</sup>, kanamycin resistance; kb, kilobase; *gfp*, green fluorescent protein gene; *rfp*, red fluorescent protein gene.

<sup>†</sup>Sequences in underlined italics indicate the restriction-enzyme recognition sites introduced into primers (XbaI, TCTAGA; SacI, GAGCTC; AvrII, CCTAGG; StuI, AGGCCT).

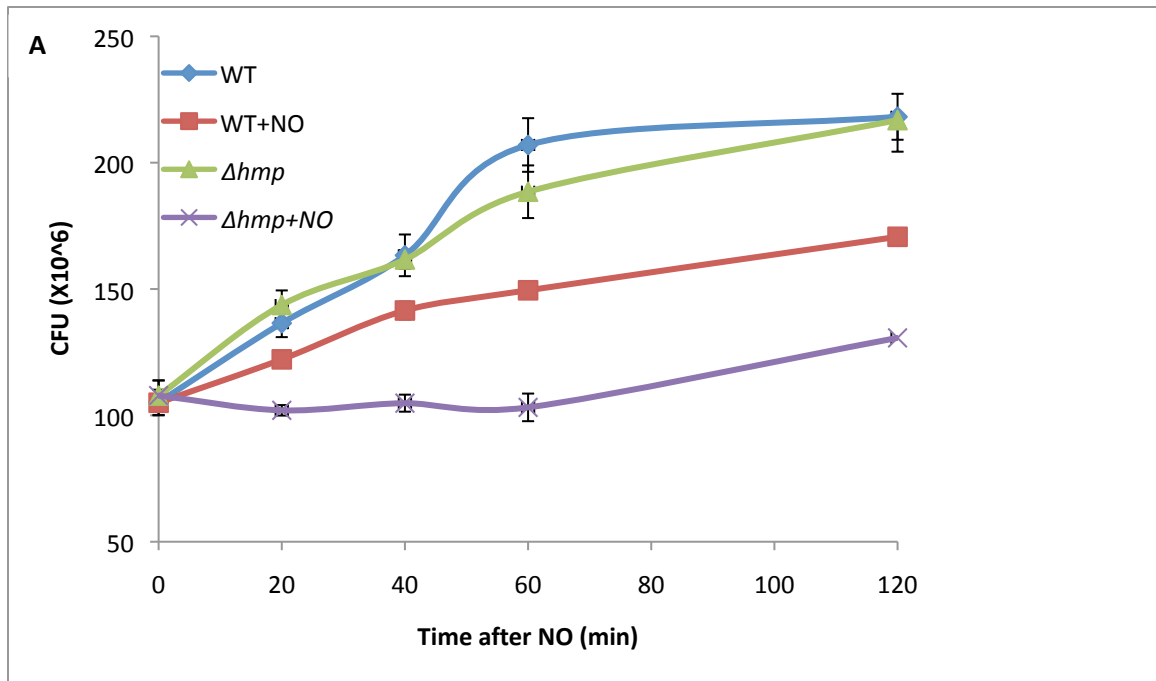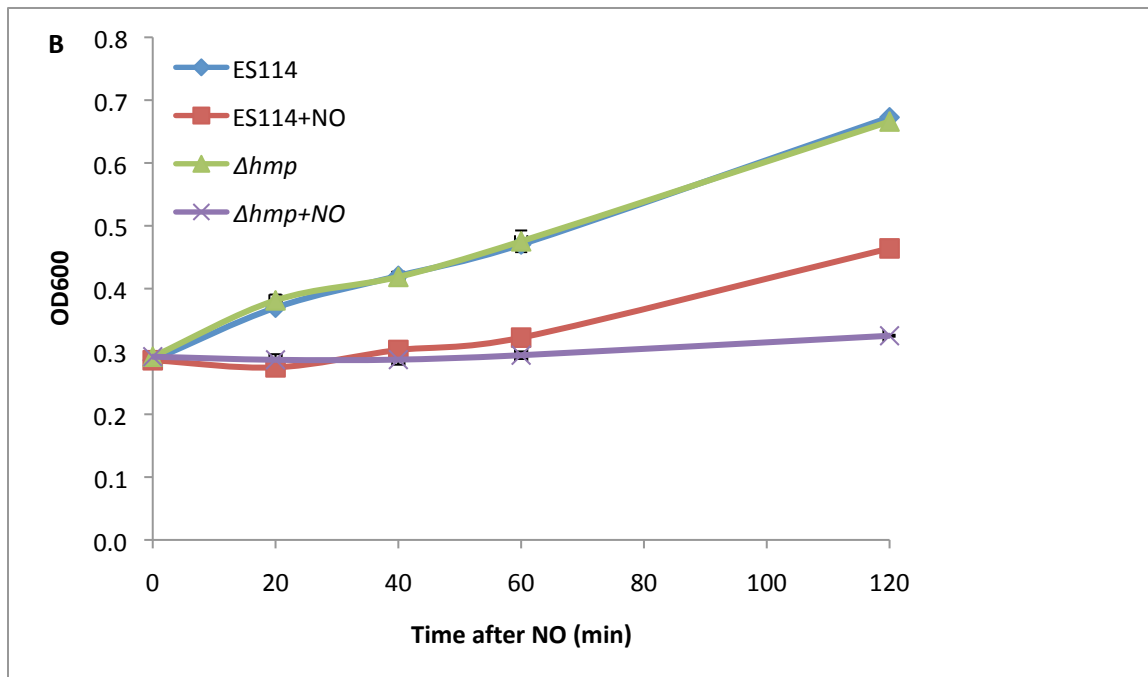

Fig. S1.

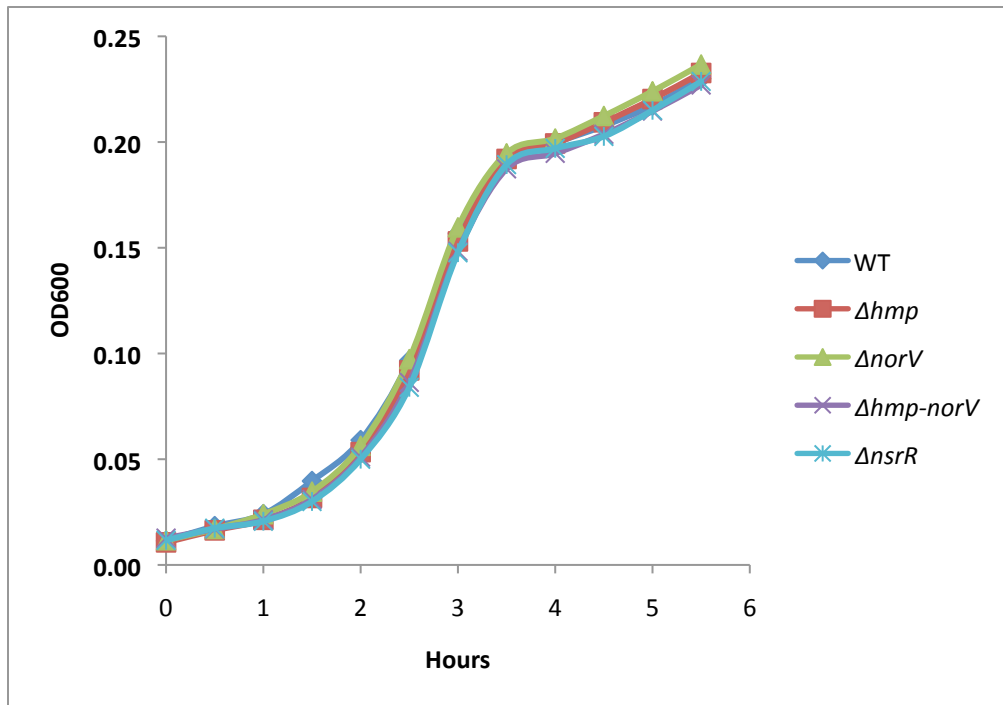

Fig. S2.

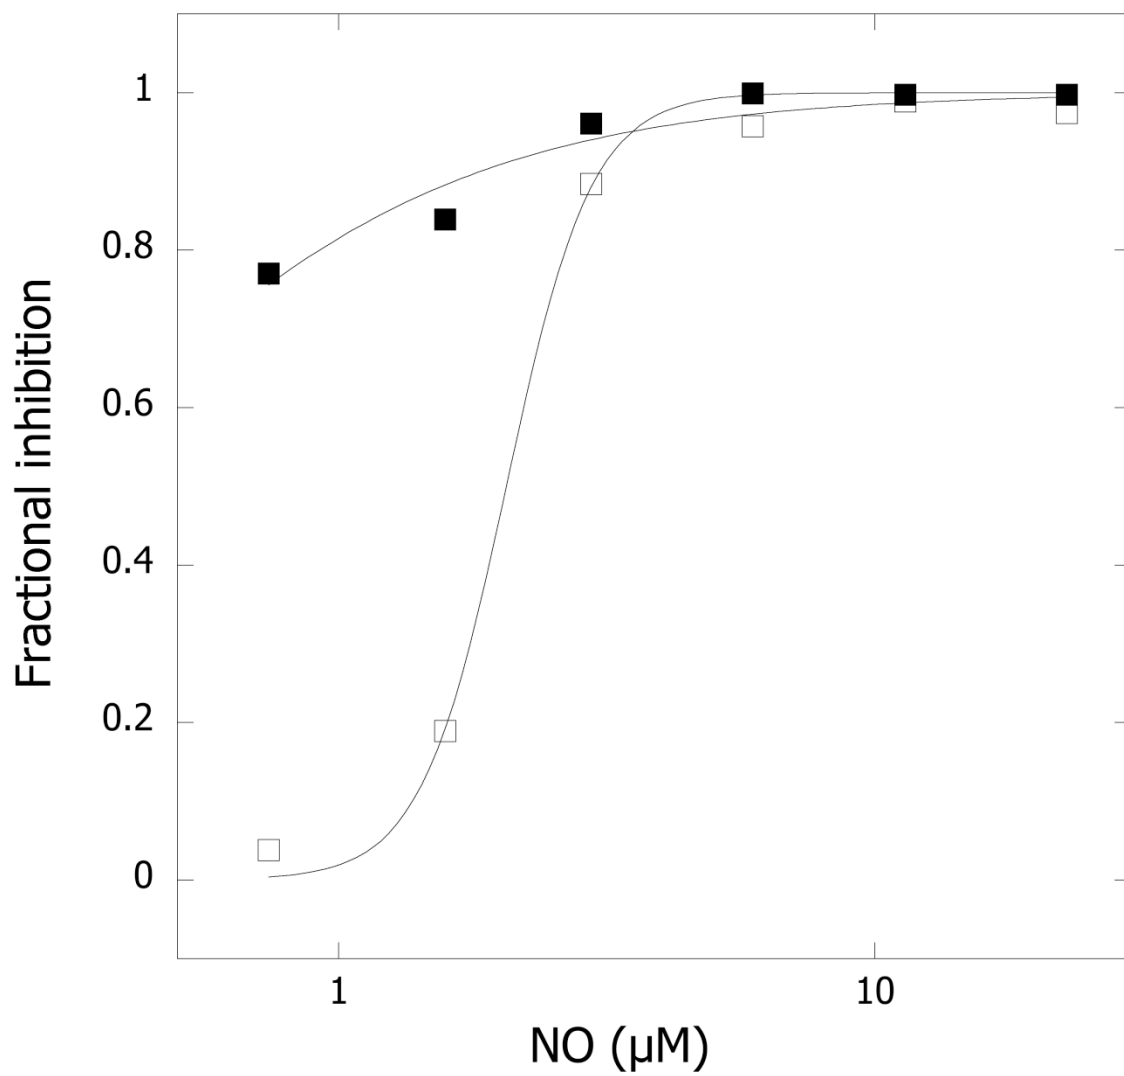

Fig. S3.

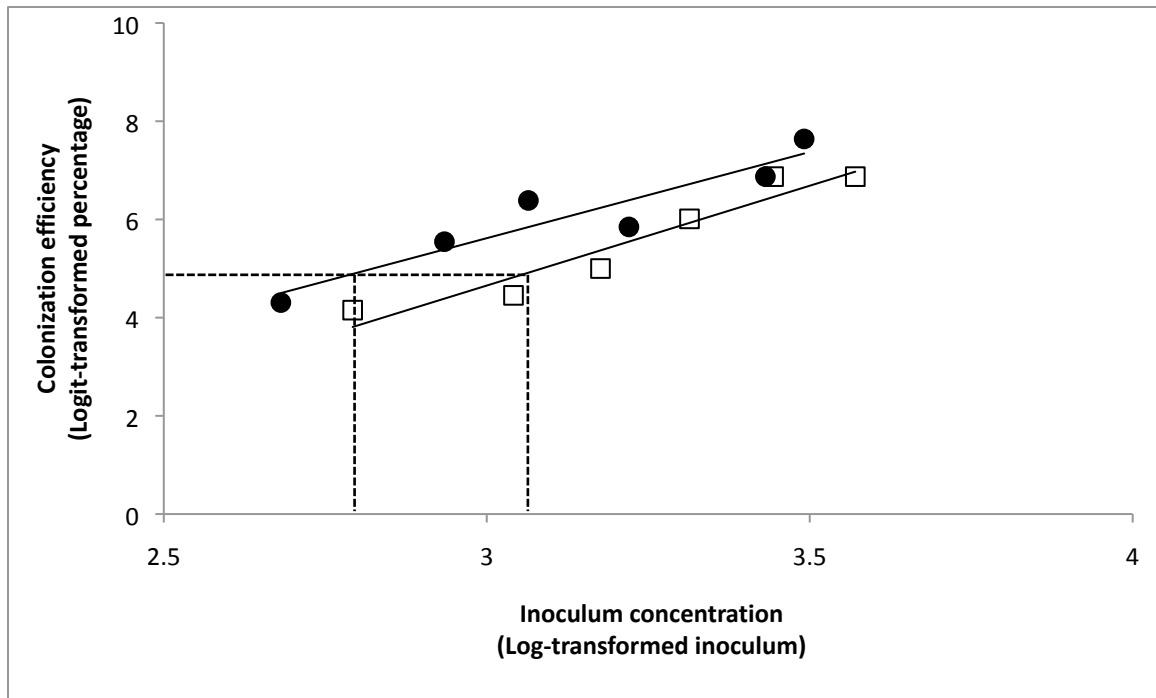

Fig. S4.

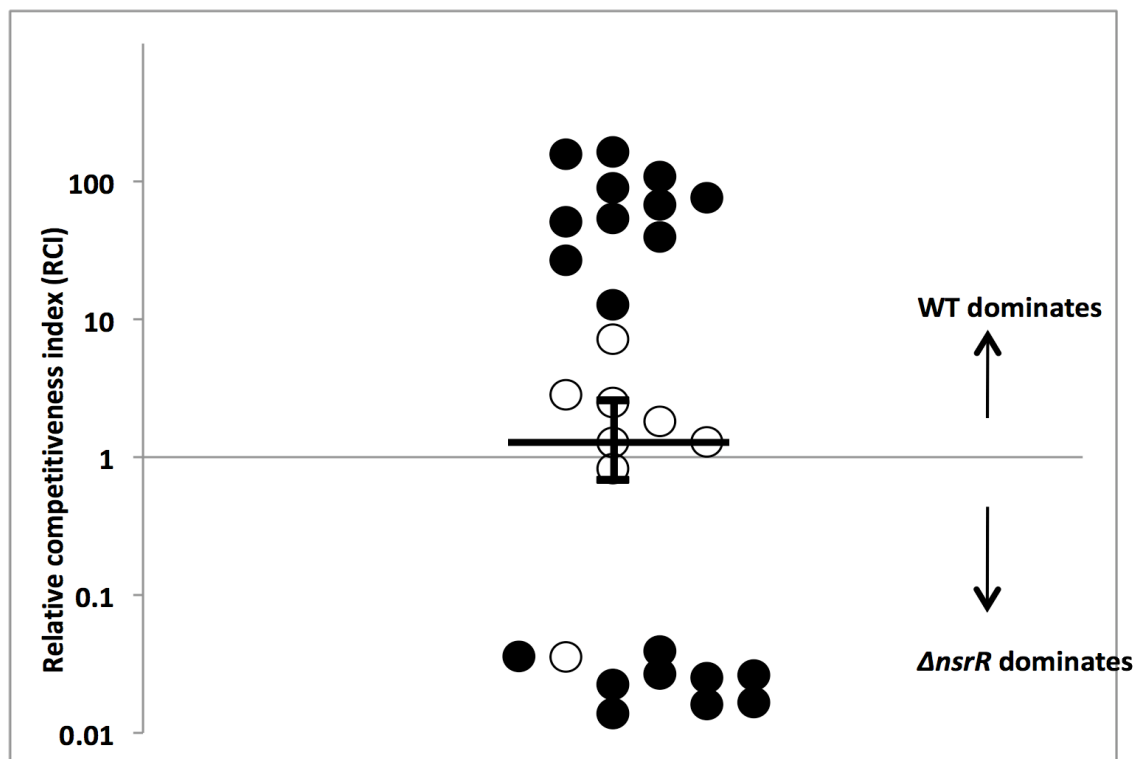

Fig. S5.



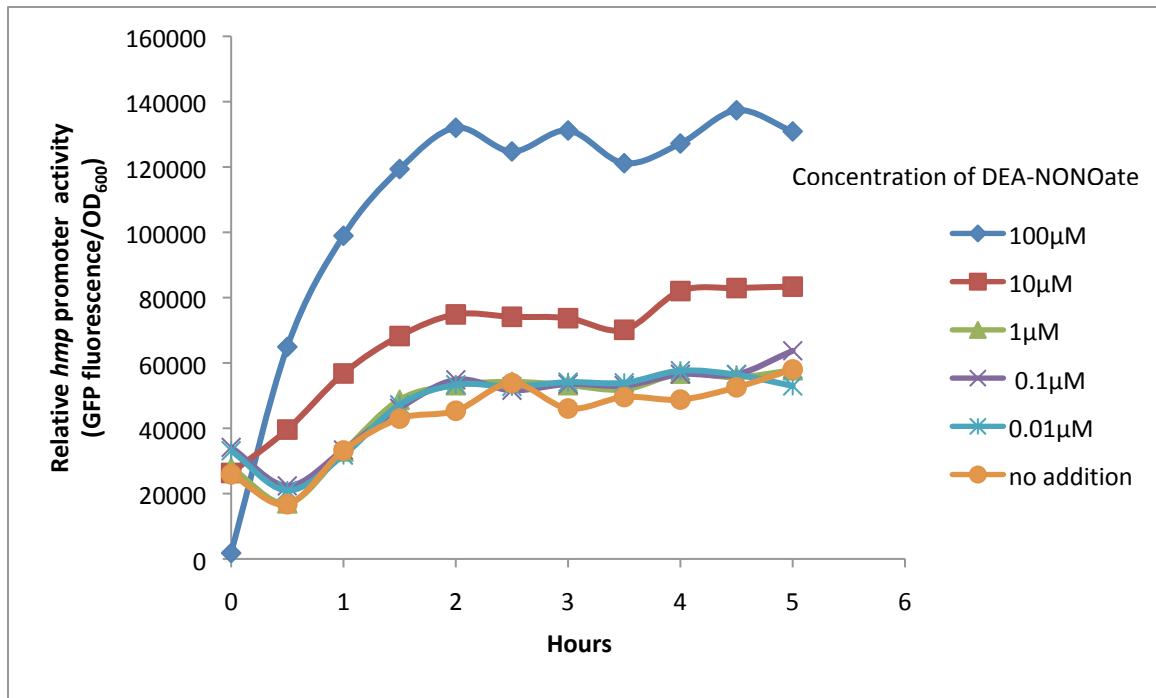

Fig. S6.

## SUPPLEMENTAL DATA

### Legends for supplementary figures

**Fig. S1.** NO exerts bacteriostatic effects on the growth of *V. fischeri*. Wild type (WT) and the  $\Delta hmp$  mutant were grown in minimal-salts medium plus GlcNAc, either in the presence or absence of an NO generator (100  $\mu$ M DEA-NONOate). OD<sub>600</sub> (A) and viable colony forming units (CFU) of the cultures (B) were monitored over time.

**Fig. S2.** Growth under anoxic conditions without NO challenge. Wild-type (WT) and four mutant strains were grown in minimal-salts medium plus GlcNAc. Growth was measured as OD<sub>600</sub>.

**Fig. S3.** NO inhibition of oxygen consumption. The fractional inhibition of oxygen consumption of wild-type (open squares) and  $\Delta hmp$  (filled squares) strains was calculated from the steady-state oxygen consumption rate immediately after NO addition, relative to the rate immediately before addition. The NO donor, Proli-NONOate, was added at several concentrations. The data were fit to the Hill equation, from which an estimate of the NO concentration required for half-maximal inhibition was derived. The experiment was repeated three times with similar results, and one representative data set is shown here.

**Fig. S4.** The minimal infection dose (MID) of wild-type (WT) and  $\Delta hmp$  strains. Newly hatched juvenile squids were exposed to between approximately 500 and 3000 CFU (per ml) of either WT (circles) or  $\Delta hmp$  (squares), and the percentage of animals colonized was determined after 24 hrs. Colonization efficiency was estimated as the

inoculation concentration at which 50% of the animals became colonized (dashed lines). The  $R^2$  values of both regressions (solid lines) were  $> 0.8$ .

**Fig. S5.** Colonization after a mixed inoculation with wild-type (WT) and  $\Delta nsrR$  strains. Newly hatched juvenile squids were exposed to a mixture of WT and  $\Delta nsrR$  at a ratio of approximately 1:1 (total dose: 3000 CFU/ml). The relative competitive index (RCI) was determined 24 hrs post-inoculation for each animal (circles). Dominance of the wild type over the mutant is indicated by an RCI value  $>1$ . The experiment was repeated three times with similar results. The mean value and 1 SEM are indicated. One representative data set is shown here. Filled circle: light organ was mono-colonized by one strain; open circle: light organ was colonized by both strains.

**Fig. S6.** Activation of the *V. fischeri hmp* promoter by exogenous NO. Wild-type (WT) cells carrying the *hmp* promoter driving *gfp* were exposed to different concentrations of the NO generator DEA-NONOate in FSW. Cell density ( $OD_{600}$ ) and GFP fluorescence level were monitored over time. The experiment was repeated twice with similar results. One representative data set is shown here.
